# Supplementary material
Source: publisher figshare collection journal article supplement (https://asha.figshare.com/ndownloader/files/14867750)
Supplement: Supplementary file 1 [file 14867750]

## Sheet: Appendix A
Online supplemental material, Rudner et al., "Poorer Speech Reception Threshold in Noise Is Associated With Lower Brain Volume in Auditory and Cognitive Processing Regions," JSLHR
https://doi.org/10.1044/2018_JSLHR-H-ASCC7-18-0142
Supplemental Material S1
Model 1
							Effect of Age					Effect of Gender					Effect of TDI					Effect of Vision Disorder					Effect of Vascular Disorder					Effect of VR					Effect of SRTn
UK B		Extract.		Mean vol.	vol. SD	R2		Vol. change					Vol. change					Vol. change					Vol. change					Vol. change					Vol. change					Vol. change
Datafield	Region	method	Prediction	N=8701			p =	mm3	%	SES		p =	mm3	%	SES		p =	mm3	%	SES		p =	mm3	%	SES		p =	mm3	%	SES		p =	mm3	%	SES		p =	mm3	%	SES
25006	Whole brain, Grey matter			795668	47901.3	0.441394	0	-27079.6	-3.40338	-0.56532		0	28906.2	3.63295	0.603453		1.1028e-05	-1700.3	-0.213695	-0.035496		0.00315484	-3283.5	-0.412672	-0.0685472		9.65997e-09	-5065.06	-0.63658	-0.10574		0.02741	-857.886	-0.10782	-0.0179094		0.00430424	-1144.12	-0.143794	-0.0238849
25008	Whole brain, White matter			711007	40799.6	0.09786	0	-12885.2	-1.81225	-0.315818		0	-9969.4	-1.40215	-0.244351		0.263112	-468.267	-0.0658597	-0.0114773		0.0257624	-2684.07	-0.377502	-0.0657866		0.33769	-915.428	-0.128751	-0.0224372		0.827584	91.6834	0.0128949	0.00224716		0.686209	175.207	0.024642	0.00429433
25010	Whole brain, grey+white matter			1.50668e+06	72925	0.318861	0	-39964.8	-2.65251	-0.548026		0	18936.8	1.25686	0.259675		0.000850334	-2168.56	-0.14393	-0.0297369		0.00141514	-5967.6	-0.396077	-0.081832		5.55146e-05	-5980.54	-0.396937	-0.0820096		0.241299	-766.092	-0.0508465	-0.0105052		0.15031	-968.903	-0.0643074	-0.0132863
25011	Thalamus, L	FIRST	Auditory	10070.9	825.7	0.243149	0	-346.053	-3.43616	-0.419102		0	386.405	3.83684	0.467972		0.0512789	-15.1199	-0.150134	-0.0183116		0.0147875	-54.3915	-0.540086	-0.0658732		8.87351e-07	-87.0525	-0.864396	-0.105429		0.113132	-12.363	-0.12276	-0.0149728		0.111293	-12.8022	-0.12712	-0.0155046
25012	Thalamus, R	FIRST	Auditory	9814.46	783.148	0.241097	0	-333.614	-3.39921	-0.425991		0	348.443	3.5503	0.444926		0.0936701	-12.35	-0.125835	-0.0157697		0.0227854	-48.2552	-0.491675	-0.061617		1.77654e-06	-80.3572	-0.818763	-0.102608		0.0541115	-14.2746	-0.145444	-0.0182272		0.0171106	-18.2072	-0.185514	-0.0232487
25013	Caudate, L	FIRST	None	4383.39	470.037	0.0718809	0	-73.2919	-1.67204	-0.155928		0	178.297	4.06757	0.379326		0.0680834	-8.92151	-0.20353	-0.0189805		0.132307	-21.1687	-0.482931	-0.0450364		0.828627	-2.41511	-0.0550969	-0.00513813		0.11556	-7.74138	-0.176607	-0.0164697		0.919657	0.511146	0.011661	0.00108746
25014	Caudate, R	FIRST	None	4611.87	496.055	0.0606876	0	-61.4955	-1.33342	-0.123969		0	190.96	4.14063	0.384959		0.0719724	-9.34129	-0.202549	-0.0188312		0.717231	-5.40774	-0.117257	-0.0109015		0.928635	1.06091	0.0230039	0.00213869		0.289868	-5.52762	-0.119856	-0.0111432		0.696395	-2.09934	-0.0455204	-0.00423208
25015	Putamen, L	FIRST	None	6227.93	680.155	0.139236	0	-272.182	-4.37035	-0.400177		3.72546e-12	96.1438	1.54375	0.141356		0.209404	-8.55294	-0.137332	-0.012575		0.828328	-4.24992	-0.0682397	-0.00624845		0.0010084	-51.1398	-0.821136	-0.0751884		0.0437319	-13.8251	-0.221985	-0.0203264		0.190892	-9.23699	-0.148316	-0.0135807
25016	Putamen, R	FIRST	None	6280.37	642.945	0.123109	0	-242.496	-3.86117	-0.377164		8.04301e-09	76.1221	1.21207	0.118396		0.195381	-8.41799	-0.134037	-0.0130929		0.747914	6.00979	0.0956917	0.00934728		0.0065322	-40.3548	-0.642554	-0.0627655		0.00839981	-17.2402	-0.27451	-0.0268144		0.0398668	-13.8487	-0.220507	-0.0215394
25017	Pallidum, L	FIRST	None	2277.07	285.585	0.0364826	0	-46.4703	-2.0408	-0.16272		0	61.1764	2.68663	0.214215		0.0033098	-8.78004	-0.385586	-0.0307441		0.0185243	-20.1945	-0.886865	-0.0707128		0.020922	-15.7258	-0.690618	-0.0550654		0.406803	-2.49732	-0.109673	-0.00874459		0.512162	-2.01751	-0.0886011	-0.00711929
25018	Pallidum, R	FIRST	None	2337.3	288.293	0.0604562	0	-63.4013	-2.71259	-0.21992		0	71.6334	3.06479	0.248475		0.0148785	-7.3	-0.312326	-0.0253215		0.0849919	-14.8257	-0.634309	-0.0514259		2.81269e-05	-28.5256	-1.22045	-0.0989468		0.0181699	-7.12343	-0.304772	-0.024709		0.0577057	-5.87879	-0.25152	-0.0204575
25019	Hippocampus, L	FIRST	Cognitive	4934.15	620.961	0.129871	0	-172.602	-3.49811	-0.27796		0	300.499	6.09019	0.483926		0.180003	-8.386	-0.169958	-0.0135049		0.972495	-0.620289	-0.0125713	-0.000998917		1.44878e-05	-61.9203	-1.25493	-0.0997169		0.00820793	-16.6357	-0.337154	-0.0267903		0.0478799	-12.8261	-0.259946	-0.0206553
25020	Hippocampus, R	FIRST	Cognitive	5071.4	618.53	0.117649	0	-183.308	-3.61454	-0.29636		0	272.389	5.37109	0.440381		0.991641	-0.0657293	-0.00129608	-0.000106267		0.230003	-21.6613	-0.427127	-0.0350207		0.00223385	-43.7771	-0.863215	-0.070776		0.0286343	-13.814	-0.272391	-0.0223337		0.00277111	-19.4595	-0.383711	-0.0314609
25021	Amygdala, L	FIRST	None	1663.61	302.344	0.00460151	0.531864	-5.34812	-0.321477	-0.0176889		0.107049	10.6475	0.640022	0.0352164		0.34295	-3.08895	-0.185678	-0.0102167		0.69143	-3.71857	-0.223525	-0.0122992		6.12772e-06	-33.6278	-2.02138	-0.111224		0.0685786	-5.96803	-0.35874	-0.0197392		0.0246288	-7.58699	-0.456056	-0.0250939
25022	Amygdala, R	FIRST	None	1627.94	340.542	0.00334035	0.16617	-4.27398	-0.262539	-0.0125505		0.716103	-2.70777	-0.166331	-0.00795136		0.58574	-2.00074	-0.1229	-0.00587516		0.862935	1.8229	0.111976	0.00535294		7.90899e-05	-33.0781	-2.0319	-0.0971337		0.238189	-4.35617	-0.267588	-0.0127919		0.13872	-5.63341	-0.346045	-0.0165425
25023	Accumbens, L	FIRST	None	658.834	146.723	0.151418	0	-62.1756	-9.43721	-0.423763		2.9976e-14	22.5288	3.4195	0.153547		0.00619689	-3.99549	-0.606449	-0.0272316		0.237852	-4.95516	-0.752109	-0.0337723		1.77302e-10	-21.2706	-3.22852	-0.144972		0.799574	-0.372769	-0.0565801	-0.00254064		0.023982	-3.41499	-0.518338	-0.0232751
25024	Accumbens, R	FIRST	None	523.28	139.828	0.184363	0	-68.2975	-13.0518	-0.488438		1.22125e-15	22.1782	4.23831	0.15861		0.00505086	-3.82397	-0.730769	-0.0273476		0.36004	-3.58996	-0.686049	-0.025674		2.67697e-09	-18.5328	-3.54166	-0.13254		0.814743	0.321421	0.0614242	0.00229868		0.188783	-1.85734	-0.354942	-0.013283
25025	Brain stem + 4th vent.	FIRST	Auditory	29485.3	2706.7	0.0179201	1.05227e-12	-351.522	-1.19219	-0.129871		2.66691e-07	302.507	1.02596	0.111762		0.095716	-48.2559	-0.16366	-0.0178283		0.0235309	-188.698	-0.639971	-0.069715		1.81853e-05	-283.415	-0.961206	-0.104709		0.147854	-42.1687	-0.143016	-0.0155794		0.973075	1.01318	0.00343621	0.000374322
25782	Frontal Pole, L	H-O-D	None	30033	2749.12	0.190498	0	-985.841	-3.28253	-0.358603		0	859.825	2.86293	0.312764		0.0607151	-50.1356	-0.166935	-0.018237		0.0904371	-130.004	-0.43287	-0.0472892		0.837872	-12.4874	-0.0415788	-0.00454232		0.369263	-24.1535	-0.0804232	-0.00878591		0.00239127	-83.8543	-0.279207	-0.0305913
25783	Frontal Pole, R	H-O-D	None	33818.7	3021.92	0.187196	0	-1014.77	-3.00061	-0.335802		0	914.947	2.70545	0.30277		0.092876	-49.3718	-0.14599	-0.0163379		0.430539	-66.5954	-0.196919	-0.0220375		0.0127669	-166.676	-0.492852	-0.0551557		0.338808	28.3034	0.0836915	0.00936603		0.00113347	-98.772	-0.292063	-0.032784
25784	Insular Cx, L	H-O-D	cognitive	8089.12	667.359	0.113705	0	-144.302	-1.7839	-0.216228		0	271.012	3.35032	0.406095		0.383041	-5.91776	-0.073157	-0.00886742		0.371661	-17.4327	-0.215509	-0.026122		0.0923669	-26.0554	-0.322105	-0.0390426		0.107756	10.9774	0.135706	0.016449		0.0184181	-16.5755	-0.204911	-0.0248374
25785	Insular Cx, R	H-O-D	cognitive	8077.04	662.729	0.0961701	0	-124.758	-1.5446	-0.188248		0	259.105	3.20792	0.390967		0.105634	-11.0092	-0.136302	-0.0166119		0.506477	-13.0001	-0.160952	-0.0196161		0.0974756	-25.7283	-0.318537	-0.0388218		0.0242608	15.4218	0.190934	0.0232701		0.00763308	-18.815	-0.232944	-0.0283902
25786	Superior Frontal Gyrus, L	H-O-D	None	14218.8	1994.77	0.0782522	0	-415.87	-2.9248	-0.20848		0	641.096	4.5088	0.321387		0.0769632	-36.9018	-0.259529	-0.0184993		0.100447	-98.3734	-0.691856	-0.0493155		0.463838	-34.8772	-0.24529	-0.0174843		0.907666	2.43772	0.0171444	0.00122205		0.211955	-26.8996	-0.189184	-0.0135359
25787	Superior Frontal Gyrus, R	H-O-D	None	12337.7	1836.41	0.0538397	0	-317.419	-2.57275	-0.172848		0	461.076	3.73712	0.251075		0.785964	-5.24582	-0.0425185	-0.00285656		0.420399	-44.6995	-0.362299	-0.0243407		0.616166	22.1217	0.179301	0.0120461		0.401785	16.3087	0.132185	0.00888073		0.412278	16.3158	0.132243	0.00894686
25788	Middle Frontal Gyrus, L	H-O-D	cognitive	12951.3	1979.15	0.056612	0	-342.651	-2.64569	-0.173131		0	420.787	3.249	0.21261		0.0764648	-36.7932	-0.284089	-0.0185904		0.726693	20.9251	0.161568	0.0105728		0.735782	-16.0033	-0.123565	-0.00808596		0.989628	0.271984	0.00210006	0.000137425		0.137424	-31.7009	-0.244771	-0.0161584
25789	Middle Frontal Gyrus, R	H-O-D	cognitive	12291	1879.31	0.0544971	0	-326.253	-2.6544	-0.173603		0	375.156	3.05228	0.199625		0.0544091	-37.9031	-0.30838	-0.0201687		0.130255	-85.5891	-0.696354	-0.0455429		0.058182	85.6029	0.696467	0.0455503		0.6275	-9.62931	-0.0783443	-0.00512387		0.00190631	-62.8604	-0.511433	-0.0337069
25790	IFG, pars triang., L	H-O-D	cognitive	3165.8	741.494	0.0597985	0	-155.752	-4.91982	-0.210051		0	162.154	5.12206	0.218686		0.565585	4.53349	0.143202	0.00611399		0.26684	25.2834	0.798642	0.0340979		0.149585	26.0337	0.822342	0.0351098		0.698434	3.07465	0.0971207	0.00414656		0.87262	-1.28677	-0.0406459	-0.0017666
25791	IFG, pars triang., R	H-O-D	cognitive	2915.73	629.21	0.0604721	0	-110.592	-3.79294	-0.175763		0	137.343	4.71042	0.218278		0.820474	1.50216	0.051519	0.00238737		0.981205	0.448461	0.0153807	0.000712736		0.400403	12.7259	0.436457	0.0202252		0.207228	-8.3848	-0.287571	-0.0133259		0.0407747	-13.7541	-0.471721	-0.0222494
25792	IFG, pars operc., L	H-O-D	cognitive	3438.12	669.841	0.0962875	0	-165.295	-4.80771	-0.246767		0	193.365	5.62416	0.288673		0.436219	-5.3951	-0.15692	-0.0080543		0.619921	9.90706	0.288154	0.0147902		0.20727	-19.8986	-0.578765	-0.0297065		0.489247	-4.82087	-0.140218	-0.00719704		0.0120714	-17.7284	-0.515644	-0.0268665
25793	IFG, pars operc., R	H-O-D	cognitive	3197.59	667.486	0.0776447	0	-147.681	-4.61852	-0.22125		0	185.711	5.80784	0.278225		0.209093	-8.65398	-0.27064	-0.012965		0.425222	-15.7843	-0.493632	-0.0236475		0.535448	-9.74077	-0.304628	-0.0145932		0.0974171	-11.4838	-0.35914	-0.0172046		0.523535	4.46674	0.139691	0.0068382
25794	Precentral Gyrus, L	H-O-D	cognitive	18460.8	2020.94	0.156704	0	-580.08	-3.14223	-0.287035		0	941.239	5.09859	0.465743		0.0787759	-35.369	-0.19159	-0.0175013		0.592464	-30.98	-0.167815	-0.0153295		0.000161201	-172.646	-0.935203	-0.0854284		0.185528	-26.804	-0.145194	-0.0132631		0.00301005	-61.6537	-0.333972	-0.0305962
25795	Precentral Gyrus, R	H-O-D	cognitive	17968.5	2030.03	0.153668	0	-616.067	-3.42859	-0.303478		0	864.056	4.80871	0.425638		0.0143134	-49.4795	-0.275367	-0.0243738		0.233977	-69.1108	-0.384621	-0.0340443		1.01411e-05	-202.686	-1.12801	-0.0998442		0.198229	-26.1616	-0.145597	-0.0128873		0.0619181	-38.9604	-0.216826	-0.0192589
25796	Temp. Pole, L	H-O-D	None	12425.8	1427.22	0.0891984	0	-412.12	-3.31663	-0.288758		8.01647e-09	172.23	1.38606	0.120675		0.18829	-19.3507	-0.155729	-0.0135583		0.855531	-7.70206	-0.0619842	-0.00539656		0.000135119	-128.15	-1.03132	-0.08979		0.0129136	-36.791	-0.296084	-0.0257781		0.00910056	-39.7655	-0.320023	-0.0278623
25797	Temp. Pole, R	H-O-D	None	12352.1	1407.29	0.08877	0	-383.88	-3.1078	-0.272779		0	273.533	2.21446	0.194369		0.148943	-20.9364	-0.169496	-0.0148771		0.28409	44.6941	0.361833	0.031759		0.000111838	-127.929	-1.03568	-0.0909044		0.196684	-18.8408	-0.152531	-0.013388		0.098975	-24.8053	-0.200818	-0.0176263
25798	STG, ant., L	H-O-D	Auditory	1907.61	353.087	0.0516717	0	-63	-3.30257	-0.178426		1.63376e-07	40.4044	2.11807	0.114432		0.660055	-1.65363	-0.0866864	-0.00468336		0.601541	5.65786	0.296595	0.016024		4.21419e-05	-34.8443	-1.8266	-0.0986848		0.00777973	10.0995	0.529431	0.0286033		0.00471783	-10.8886	-0.570797	-0.0311144
25799	STG, ant., R	H-O-D	Auditory	1915.4	359.448	0.0526484	0	-69.7644	-3.64229	-0.194087		2.00546e-11	52.6556	2.74907	0.14649		0.793155	1.00043	0.0522311	0.00278325		0.407418	9.11097	0.47567	0.0253471		9.26029e-05	-33.7387	-1.76145	-0.0938625		0.00361049	11.203	0.584892	0.0311673		0.224412	-4.74704	-0.247836	-0.0133452
25800	STG, post., L	H-O-D	Auditory	3368.44	578.474	0.0743097	0	-132.998	-3.94836	-0.229912		1.11022e-16	103.671	3.07773	0.179215		0.429686	4.77823	0.141853	0.00826006		0.0657464	-31.8532	-0.945639	-0.0550643		0.0967537	-22.8369	-0.677968	-0.0394779		0.164189	8.47254	0.251527	0.0146464		0.00194258	-19.1794	-0.569386	-0.0334812
25801	STG, post., R	H-O-D	Auditory	4053.63	631.991	0.0974579	0	-181.244	-4.47114	-0.286782		0	148.371	3.66019	0.234767		0.225797	7.92488	0.195501	0.0125396		0.0650132	-34.5448	-0.852193	-0.0546602		0.226272	-18.0072	-0.444225	-0.0284929		0.710825	-2.43708	-0.0601209	-0.00385619		0.00885755	-17.5278	-0.432398	-0.0280005
25802	MiTG, ant., L	H-O-D	Auditory	2384.77	456.478	0.0462267	0	-86.05	-3.60831	-0.188508		4.10038e-06	-44.9501	-1.88488	-0.0984715		0.150185	-6.97481	-0.292473	-0.0152796		0.528247	-8.78983	-0.368581	-0.0192558		5.79683e-11	-71.5343	-2.99963	-0.156709		0.100982	8.02345	0.336445	0.0175769		0.712253	1.83723	0.07704	0.00406666
25803	MiTG, ant., R	H-O-D	Auditory	2103.08	372.891	0.0409679	0	-62.7787	-2.98508	-0.168357		0.000949346	26.6321	1.26634	0.0714208		0.39564	-3.34975	-0.159278	-0.00898319		0.386281	9.85828	0.468754	0.0264375		2.37579e-06	-42.0929	-2.00148	-0.112883		0.623904	1.94766	0.0926097	0.00522314		0.236164	-4.78086	-0.227326	-0.0129801
25804	MiTG, post., L	H-O-D	Auditory	6893.97	991.863	0.0916922	0	-248.112	-3.59897	-0.250147		0	207.194	3.00544	0.208894		0.678159	-4.2518	-0.0616741	-0.00428668		0.585293	-16.0677	-0.233069	-0.0161995		0.000735204	-78.5312	-1.13913	-0.0791755		0.01275	-25.6373	-0.37188	-0.0258476		0.0143159	-25.7801	-0.373951	-0.0261851
25805	MiTG, post., R	H-O-D	Auditory	7136.9	1003.2	0.11859	0	-271.405	-3.80284	-0.27054		0	345.969	4.84761	0.344867		0.395908	-8.65755	-0.121307	-0.00862997		0.0488005	-57.6027	-0.807111	-0.0574192		0.0560852	-44.3472	-0.62138	-0.044206		0.116394	-16.1004	-0.225594	-0.0160491		0.108743	-16.803	-0.235438	-0.016889
25806	MiTG, temporooccip., L	H-O-D	Auditory	4520.29	946.878	0.035372	0	-90.7509	-2.00763	-0.0958423		0	189.449	4.19107	0.200077		0.0721675	-18.0571	-0.399468	-0.0190702		0.0458899	-57.6699	-1.2758	-0.0609053		0.071028	-41.3697	-0.9152	-0.0436907		0.607828	-5.18418	-0.114687	-0.00547502		0.209418	-13.0636	-0.289	-0.0137966
25807	MiTG, temporooccip., R	H-O-D	Auditory	6088.96	1090.31	0.0287052	0	-149.594	-2.4568	-0.137204		0.00808741	-62.3378	-1.02378	-0.0571746		0.0453521	-23.2237	-0.381407	-0.0213002		0.0224852	-76.1719	-1.25098	-0.0698629		0.051924	-51.4675	-0.84526	-0.0472047		0.326232	-11.4595	-0.188201	-0.0105103		0.108348	-19.3099	-0.31713	-0.0177105
25808	ITG, ant., L	H-O-D	None	1883.03	388.515	0.0273107	0	-54.6474	-2.9021	-0.140657		0.0802083	-14.5763	-0.774088	-0.037518		0.886408	-0.588943	-0.0312764	-0.00151588		0.84629	2.30064	0.122178	0.00592163		4.09115e-05	-38.2241	-2.02993	-0.0983853		0.0278321	-9.10389	-0.483471	-0.0234325		0.527572	2.65085	0.140776	0.00695393
25809	ITG, ant., R	H-O-D	None	1958.06	345.106	0.026418	0	-50.2469	-2.56616	-0.145599		0.0086045	19.6883	1.0055	0.0570499		0.188709	-4.82518	-0.246427	-0.0139817		0.277428	11.5162	0.588144	0.0333701		0.000412947	-29.4063	-1.50181	-0.0852095		0.0505157	-7.21809	-0.368635	-0.0209156		0.0390291	-7.74609	-0.395601	-0.0227379
25810	ITG, post., L	H-O-D	None	5377.06	890.706	0.0268108	0	-153.507	-2.85486	-0.172343		0.192814	-25.0803	-0.466432	-0.0281578		0.00520711	-26.5295	-0.493383	-0.0297848		0.0767386	48.6732	0.905201	0.0546456		0.608751	-11.104	-0.206508	-0.0124665		0.0992373	-15.7615	-0.293124	-0.0176955		0.896782	-1.26732	-0.0235691	-0.0014364
25811	ITG, post., R	H-O-D	None	5436.44	866.38	0.0443049	0	-154.704	-2.84569	-0.178564		1.63058e-06	90.3816	1.66251	0.104321		0.00181861	-28.6573	-0.527133	-0.033077		0.430049	20.9489	0.385342	0.0241798		0.00314705	-61.7331	-1.13554	-0.0712541		0.0261381	-20.5752	-0.378468	-0.0237485		0.0128456	-23.4803	-0.431906	-0.027362
25812	ITG, temporooccip., L	H-O-D	None	3920.31	731.708	0.00780345	1.17415e-10	-38.05	-0.970586	-0.0520016		0.796622	4.11381	0.104936	0.0056222		0.340492	-7.50169	-0.191354	-0.0102523		0.174888	-30.7121	-0.783408	-0.0419731		0.903935	-2.16737	-0.0552857	-0.00296207		0.57745	-4.41082	-0.112512	-0.00602812		0.165863	-11.3025	-0.288306	-0.0154467
25813	ITG, temporooccip., R	H-O-D	None	4991.82	874.032	0.0163772	8.32947e-10	-63.775	-1.27759	-0.0729664		0	-172.159	-3.44882	-0.196971		0.126898	-14.2884	-0.286236	-0.0163476		0.0779019	-47.4687	-0.950931	-0.0543101		0.109822	-34.1538	-0.684195	-0.0390761		0.162644	-13.148	-0.263391	-0.0150429		0.28558	-10.3596	-0.207531	-0.0118527
25814	Postcentral Gyrus, L	H-O-D	None	14798.2	1838.37	0.179807	0	-499.67	-3.37656	-0.2718		0	1086.48	7.34198	0.591002		0.366982	-16.2169	-0.109587	-0.00882136		0.0322572	-110.373	-0.745851	-0.0600382		1.44588e-06	-196.571	-1.32834	-0.106927		0.00643223	-49.232	-0.332689	-0.0267802		0.0639061	-34.3081	-0.231839	-0.0187673
25815	Postcentral Gyrus, R	H-O-D	None	13765.5	1803.66	0.200168	0	-480.894	-3.49348	-0.266621		0	1126.11	8.18064	0.624343		0.281973	-18.74	-0.136138	-0.01039		0.0581081	-94.9421	-0.689711	-0.0526385		2.35482e-05	-168.136	-1.22143	-0.0932193		0.0599248	-32.9688	-0.239504	-0.0182788		0.0312467	-38.8876	-0.282501	-0.0215604
25816	Superior Parietal Lobule, L	H-O-D	cognitive	6654.45	1155.9	0.0743472	0	-211.611	-3.18	-0.183071		0	384.004	5.77063	0.332213		0.894401	1.59393	0.0239528	0.00137895		0.171691	-47.2113	-0.70947	-0.0408438		0.492664	-18.7993	-0.282508	-0.0162638		0.00436751	-34.4409	-0.517563	-0.0297958		0.156816	17.6222	0.264818	0.0152454
25817	Superior Parietal Lobule, R	H-O-D	cognitive	6020.63	1109.17	0.0601795	0	-188.77	-3.13539	-0.170191		0	332.116	5.5163	0.299429		0.0767575	-20.5502	-0.34133	-0.0185276		0.0548144	-64.1388	-1.06532	-0.0578262		0.251684	-30.3697	-0.504428	-0.0273807		0.30206	-12.0548	-0.200224	-0.0108683		0.449759	-9.09521	-0.151067	-0.00820004
25818	SMG, ant., L	H-O-D	None	4142.05	795.243	0.027341	0	-69.1217	-1.66878	-0.0869189		0	178.683	4.31389	0.22469		0.151939	-12.2399	-0.295503	-0.0153913		0.245441	-28.4851	-0.687705	-0.0358193		0.735598	-6.58711	-0.15903	-0.00828314		0.584182	4.71307	0.113786	0.00592659		0.992835	0.078605	0.00189773	0.000100125
25819	SMG, ant., R	H-O-D	None	4082.37	757.396	0.0486458	0	-84.1196	-2.06056	-0.111064		0	277.393	6.7949	0.366246		0.651203	-3.61878	-0.0886439	-0.00477792		0.243371	-26.7845	-0.656101	-0.035364		0.0692081	-33.0719	-0.810115	-0.0436653		0.505103	-5.36587	-0.13144	-0.00708463		0.127433	-12.5109	-0.306461	-0.016679
25820	SMG, post., L	H-O-D	None	6015.88	1019.92	0.0320335	0	-94.7498	-1.575	-0.0928997		0	226.022	3.75709	0.221609		0.720022	-3.90314	-0.0648805	-0.00382692		0.368792	-28.0947	-0.467009	-0.0275461		0.584223	-13.5869	-0.22585	-0.0133216		0.724297	3.86659	0.0642731	0.00379109		0.0474801	-22.1371	-0.367978	-0.0219013
25821	SMG, post., R	H-O-D	None	7113.55	1287.57	0.0703967	0	-288.748	-4.05913	-0.224258		0	301.673	4.24082	0.234296		0.553825	8.01555	0.11268	0.00622532		0.0116253	-97.5525	-1.37136	-0.0757647		0.0127808	-76.4759	-1.07507	-0.0593954		0.10641	-21.9458	-0.308507	-0.0170443		0.0160604	-33.3676	-0.469071	-0.0261649
25822	Angular Gyrus, L	H-O-D	None	5277.18	959.122	0.040901	0	-87.4408	-1.65696	-0.0911676		0	287.499	5.44797	0.299752		0.948403	-0.660157	-0.0125097	-0.000688294		0.66617	-12.6446	-0.239608	-0.0131835		0.0744206	-41.3718	-0.783976	-0.0431351		0.205104	-12.9898	-0.24615	-0.0135434		0.0458127	-20.8506	-0.395109	-0.0219753
25823	Angular Gyrus, R	H-O-D	None	7150.16	1351.83	0.0459137	0	-240.153	-3.35871	-0.17765		1.2162e-09	179.896	2.51597	0.133076		0.153388	-20.5252	-0.287059	-0.0151832		0.206501	-52.1226	-0.728972	-0.038557		0.0254295	-73.0507	-1.02166	-0.0540383		0.523535	9.245	0.129298	0.00683887		0.0286485	-32.2528	-0.451079	-0.0241018
25824	Lateral Occipital Cx, sup., L	H-O-D	None	21090.3	2690.88	0.159934	0	-759.364	-3.60053	-0.282199		0	1389.41	6.58791	0.516341		0.00108464	-87.0449	-0.412724	-0.0323481		0.00117669	-248.601	-1.17875	-0.0923867		0.000235124	-223.586	-1.06013	-0.0830902		0.0190718	-62.8111	-0.297819	-0.0233422		0.00953142	-71.5655	-0.339328	-0.0265956
25825	Lateral Occipital Cx, sup., R	H-O-D	None	20216.5	2640.75	0.12702	0	-851.432	-4.21157	-0.32242		0	813.982	4.02633	0.308239		0.0326391	-56.927	-0.281587	-0.0215571		0.424322	-61.2254	-0.302849	-0.0231849		0.326812	-59.6118	-0.294868	-0.0225738		0.00224603	-81.9182	-0.405205	-0.0310208		0.0197219	-64.3903	-0.318504	-0.0243834
25826	Lateral Occipital Cx, inf., L	H-O-D	None	9411.84	1435.55	0.0542764	0	-259.453	-2.75667	-0.180735		0	317.932	3.37801	0.221471		0.127501	-23.0688	-0.245104	-0.0160697		0.555496	-25.6631	-0.272669	-0.0178769		0.387776	-29.8185	-0.316819	-0.0207715		0.622626	-7.49984	-0.0796851	-0.00522437		0.18008	-20.8973	-0.222032	-0.0146508
25827	Lateral Occipital Cx, inf., R	H-O-D	None	10023.3	1494.83	0.0568009	0	-365.646	-3.64797	-0.244607		0.00197016	-98.572	-0.983432	-0.0659419		0.0286033	-34.4805	-0.344005	-0.0230665		0.83401	-9.50574	-0.0948368	-0.00635907		0.343584	-34.0404	-0.339614	-0.0227721		0.329354	-15.4706	-0.154347	-0.0103494		0.503854	-10.8522	-0.10827	-0.00730821
25828	Intracalcarine Cx, L	H-O-D	None	3371.81	734.937	0.0277633	0	-116.079	-3.44262	-0.157944		0.0112525	40.5916	1.20385	0.0552314		0.0169894	-18.6809	-0.554031	-0.0254184		0.136341	-33.4549	-0.992193	-0.0455208		0.362284	-16.273	-0.48262	-0.0221421		0.20734	9.96882	0.295652	0.0135642		0.140044	-11.7882	-0.34961	-0.0163009
25829	Intracalcarine Cx, R	H-O-D	None	3511.67	696.786	0.0340449	0	-130.218	-3.70815	-0.186884		3.84324e-06	70.1828	1.99856	0.100724		0.0139308	-18.1818	-0.517752	-0.0260938		0.520029	-13.688	-0.389785	-0.0196445		0.389211	-14.5327	-0.41384	-0.0208568		0.163039	10.417	0.29664	0.0149501		0.236102	-8.98017	-0.255723	-0.0130454
25830	Frontal Medial Cx, L	H-O-D	cognitive	2463.88	405.376	0.0809995	0	-88.994	-3.61194	-0.219534		0	97.0819	3.9402	0.239486		0.789957	-1.1177	-0.0453635	-0.0027572		0.571378	-6.83174	-0.277275	-0.0168528		0.00670934	-25.9625	-1.05372	-0.0640454		0.550188	-2.5222	-0.102367	-0.00622187		0.41082	-3.57688	-0.145172	-0.00882361
25831	Frontal Medial Cx, R	H-O-D	cognitive	2461.37	410.535	0.0922412	0	-86.5307	-3.51554	-0.210775		0	115.746	4.70251	0.281941		0.562144	2.44818	0.0994639	0.00596339		0.930724	-1.05609	-0.0429065	-0.00257247		0.000751886	-32.4875	-1.31989	-0.0791346		0.325278	-4.17958	-0.169807	-0.0101808		0.00392556	-12.6275	-0.513025	-0.0307586
25832	Juxtapositional Lobule Cx, L	H-O-D	None	3719.42	683.808	0.0500124	0	-127.579	-3.43009	-0.186572		0	158.838	4.27051	0.232285		0.0243082	-16.2106	-0.435835	-0.0237063		0.0200225	-48.1542	-1.29467	-0.0704206		0.237247	-19.4092	-0.521835	-0.0283841		0.591669	-3.88362	-0.104415	-0.00567941		0.325012	7.34113	0.197373	0.0107357
25833	Juxtapositional Lobule Cx, R	H-O-D	None	3600.27	689.016	0.059013	0	-143.843	-3.99534	-0.208766		0	149.103	4.14145	0.216401		0.0760418	-12.8049	-0.355665	-0.0185843		0.0293871	-45.2237	-1.25612	-0.0656352		0.0223746	-37.6176	-1.04486	-0.0545962		0.433261	-5.68947	-0.158029	-0.00825738		0.75102	-2.37331	-0.0659203	-0.00344449
25834	Subcallosal Cx, L	H-O-D	None	3775.51	401.021	0.0826629	0	-115.027	-3.04666	-0.286835		3.64229e-05	34.9538	0.925803	0.0871619		0.0262917	-9.21615	-0.244104	-0.0229817		0.131586	-17.9682	-0.475915	-0.0448061		0.133224	-14.2012	-0.376141	-0.0354127		0.0213712	9.62739	0.254996	0.0240072		0.480697	-3.02071	-0.0800081	-0.00756493
25835	Subcallosal Cx, R	H-O-D	None	3497.5	348.401	0.0290163	0	-53.7854	-1.53782	-0.154378		0.00020851	28.0675	0.802501	0.0805608		0.125049	-5.69444	-0.162815	-0.0163445		0.42336	-8.54505	-0.244319	-0.0245265		0.530968	5.31542	0.151978	0.0152566		0.075521	6.64948	0.190121	0.0190857		0.450343	-2.89794	-0.0828574	-0.00833905
25836	Paracingulate Gyrus, L	H-O-D	cognitive	7418.83	944.301	0.155002	0	-326.01	-4.39436	-0.34524		0	267.173	3.60128	0.282932		0.0677596	-17.2956	-0.23313	-0.0183157		0.0857893	-46.6985	-0.629459	-0.049453		0.0116142	-54.3948	-0.733199	-0.0576032		0.340997	-9.07474	-0.12232	-0.00961001		0.0048734	-27.4615	-0.370159	-0.0292413
25837	Paracingulate Gyrus, R	H-O-D	cognitive	7350.54	983.371	0.179301	0	-362.891	-4.93693	-0.369028		0	374.545	5.09548	0.380879		0.0302112	-21.0836	-0.286831	-0.0214402		0.744592	9.13336	0.124254	0.0092878		0.272785	-24.3361	-0.331079	-0.0247476		0.426573	-7.78714	-0.10594	-0.00791882		0.0159167	-24.2223	-0.329531	-0.0247133
25838	Cingulate Gyrus, ant., L	H-O-D	cognitive	6501.75	1170.65	0.00868342	3.26709e-06	7.29111	0.112141	0.00622827		3.44329e-11	165.387	2.54374	0.141278		0.294796	-12.7029	-0.195377	-0.0108512		0.857886	6.25407	0.0961907	0.0053424		0.115609	43.725	0.672511	0.0373511		0.142685	-17.874	-0.274911	-0.0152685		0.739685	-4.09515	-0.0629854	-0.00356911
25839	Cingulate Gyrus, ant., R	H-O-D	cognitive	7185.47	1303.55	0.00643934	0.00268027	54.633	0.760326	0.0419109		2.0605e-09	167.839	2.3358	0.128755		0.450776	-10.2752	-0.142999	-0.00788244		0.53927	-24.0373	-0.334526	-0.0184398		0.279899	33.6988	0.468985	0.0258515		0.0442064	-27.5505	-0.383419	-0.0211349		0.388331	11.9751	0.166657	0.00935995
25840	Cingulate Gyrus, post., L	H-O-D	None	6720.26	711.731	0.0372147	0	-95.0247	-1.414	-0.133512		2.71356e-11	-100.147	-1.49023	-0.140709		0.518999	-4.80826	-0.0715487	-0.00675573		0.760333	-6.54112	-0.0973343	-0.00919044		0.794419	4.43631	0.066014	0.00623314		0.880185	1.13112	0.0168314	0.00158925		0.713884	-2.8149	-0.0418867	-0.00398137
25841	Cingulate Gyrus, post., R	H-O-D	None	7033.68	730.49	0.0229262	0	-63.4387	-0.901927	-0.086844		0.00761378	-41.5167	-0.590255	-0.056834		0.523862	-4.90066	-0.0696741	-0.00670873		0.21246	-27.5302	-0.391405	-0.0376873		0.856443	3.17557	0.0451481	0.00434719		0.630977	-3.7157	-0.0528272	-0.00508659		0.2126	-9.85717	-0.140142	-0.0135925
25842	Precuneous Cx, L	H-O-D	None	13066.9	1440.12	0.115009	0	-384.708	-2.94414	-0.267136		0	405.8	3.10556	0.281782		0.145691	-21.227	-0.162449	-0.0147397		0.08186	-72.8777	-0.557728	-0.0506053		0.836238	6.8887	0.0527187	0.00478341		0.757348	4.53907	0.0347372	0.00315187		0.0387095	-31.095	-0.237968	-0.0216993
25843	Precuneous Cx, R	H-O-D	None	13656.7	1530.05	0.13243	0	-460.013	-3.36842	-0.300652		0	429.93	3.14814	0.28099		0.0317629	-33.045	-0.24197	-0.0215973		0.16679	-61.1303	-0.447623	-0.0399531		0.373634	-31.2395	-0.22875	-0.0204173		0.438674	12.0075	0.0879245	0.00784781		0.0114282	-40.1493	-0.293991	-0.0263598
25844	Cuneal Cx, L	H-O-D	None	2548.3	480.226	0.0627492	0	-105.668	-4.14663	-0.220039		0	115.573	4.53529	0.240663		0.356372	-4.67801	-0.183574	-0.00974128		0.170775	-19.924	-0.781854	-0.0414888		0.639482	5.43213	0.213167	0.0113116		0.0897963	-8.65025	-0.339452	-0.0180129		0.171688	-7.09868	-0.278565	-0.014955
25845	Cuneal Cx, R	H-O-D	None	3020.97	549.392	0.0612911	0	-133.503	-4.41921	-0.243002		0.00113849	38.4397	1.27243	0.0699677		0.367168	-5.21332	-0.172571	-0.00948925		0.271949	-18.2287	-0.603405	-0.0331798		0.956735	-0.71617	-0.0237066	-0.00130357		0.486544	-4.04752	-0.133981	-0.00736727		0.924086	-0.564476	-0.0186853	-0.00103998
25846	Frontal Orbital Cx, L	H-O-D	None	8605.82	911.445	0.156996	0	-334.508	-3.88699	-0.367008		0	202.542	2.35355	0.222221		0.111137	-14.3963	-0.167286	-0.015795		0.561669	-15.0844	-0.175281	-0.01655		0.240427	-24.2059	-0.281273	-0.0265577		0.87393	1.44236	0.0167603	0.0015825		0.473755	-6.70914	-0.0779605	-0.007361
25847	Frontal Orbital Cx, R	H-O-D	None	7820.53	853.307	0.164045	0	-301.126	-3.85046	-0.352893		0	239.892	3.06746	0.281132		0.621552	-4.15863	-0.0531758	-0.00487355		0.705526	-9.15629	-0.11708	-0.0107304		0.535516	-11.9107	-0.152301	-0.0139583		0.919484	0.85667	0.0109541	0.00100394		0.263993	-9.75295	-0.12471	-0.0114296
25848	parahipp. Gyrus, ant., L	H-O-D	cognitive	3815.7	474.735	0.0578636	0	-123.731	-3.24269	-0.260632		0.11781	15.7849	0.413683	0.0332499		0.277182	-5.40694	-0.141702	-0.0113894		0.699717	5.52	0.144666	0.0116275		3.13239e-05	-47.295	-1.23949	-0.099624		0.61131	-2.54382	-0.0666672	-0.00535839		0.526776	-3.26394	-0.0855397	-0.00687528
25849	parahipp. Gyrus, ant., R	H-O-D	cognitive	3894.34	500.902	0.0484395	0	-121.427	-3.11802	-0.242416		3.77479e-07	-54.4016	-1.39694	-0.108607		0.777617	1.49007	0.0382624	0.00297477		0.571875	8.57878	0.220288	0.0171267		2.30519e-06	-56.9165	-1.46152	-0.113628		0.26003	-5.97839	-0.153515	-0.0119353		0.325373	-5.37795	-0.138096	-0.0107365
25850	parahipp. Gyrus, post., L	H-O-D	cognitive	2206.37	272.052	0.0824999	0	-67.6076	-3.0642	-0.248509		0	97.585	4.42288	0.358699		0.0255804	-6.28267	-0.284751	-0.0230936		0.466512	5.89346	0.267111	0.0216629		0.158917	-9.04534	-0.409965	-0.0332485		0.000674063	-9.6273	-0.436341	-0.0353876		0.184692	3.86845	0.175331	0.0142195
25851	parahipp. Gyrus, post., R	H-O-D	cognitive	1785.66	227.769	0.085716	0	-52.6081	-2.94613	-0.230971		0	90.6306	5.07546	0.397906		0.35992	-2.15299	-0.120571	-0.00945253		0.275174	7.38143	0.413372	0.0324076		0.216893	-6.62645	-0.371092	-0.0290929		5.62694e-05	-9.53357	-0.533895	-0.0418564		0.508259	1.6124	0.090297	0.00707912
25852	Lingual Gyrus, L	H-O-D	None	8383.82	901.076	0.0462099	0	-215.958	-2.57589	-0.239666		3.05322e-06	-90.0065	-1.07357	-0.0998878		0.0497843	-18.6433	-0.222373	-0.0206901		0.165638	-37.8935	-0.451983	-0.0420536		0.00368141	-62.9862	-0.751283	-0.0699011		0.113941	-15.1116	-0.180248	-0.0167706		0.684808	-3.99752	-0.0476814	-0.00443638
25853	Lingual Gyrus, R	H-O-D	None	8987.4	920.198	0.055804	0	-248.505	-2.76504	-0.270056		0.0153478	-47.4774	-0.528267	-0.0515948		0.0794942	-16.9324	-0.188402	-0.0184008		0.802291	-6.95337	-0.077368	-0.00755638		0.000101008	-85.6968	-0.953522	-0.0931286		0.0819301	-16.898	-0.188018	-0.0183634		0.597525	-5.28311	-0.0587835	-0.00574127
25854	Temp. Fusiform Cx, ant., L	H-O-D	None	1953.76	293.143	0.0754722	0	-76.5127	-3.91618	-0.261008		0.000174489	23.1788	1.18637	0.07907		0.594456	-1.62033	-0.0829341	-0.00552744		0.233756	-10.4244	-0.533557	-0.0355608		3.81451e-08	-38.2242	-1.95645	-0.130394		0.0709592	5.52932	0.283009	0.0188622		0.100571	-5.18012	-0.265137	-0.017671
25855	Temp. Fusiform Cx, ant., R	H-O-D	None	1790.9	263.329	0.0510038	0	-58.092	-3.24372	-0.220606		0.0264252	-12.4734	-0.696484	-0.047368		0.815763	0.645377	0.0360363	0.00245084		0.785333	2.17009	0.121173	0.008241		0.000543858	-21.8648	-1.22088	-0.0830323		0.715052	1.01732	0.0568046	0.00386329		0.0101523	-7.38103	-0.41214	-0.0280297
25856	Temp. Fusiform Cx, post., L	H-O-D	None	5155.25	632.702	0.0916048	0	-184.854	-3.58573	-0.292166		1.35774e-08	75.8645	1.4716	0.119906		0.00237334	-19.82	-0.384463	-0.031326		0.484842	-13.1093	-0.254289	-0.0207195		0.996456	-0.0662023	-0.00128417	-0.000104634		0.746178	2.12767	0.041272	0.00336284		0.0809765	-11.7311	-0.227555	-0.0186542
25857	Temp. Fusiform Cx, post., R	H-O-D	None	4202.23	522.258	0.085636	0	-141.251	-3.36132	-0.270461		1.17977e-10	71.6111	1.70412	0.137118		0.0094919	-14.0585	-0.334549	-0.0269188		0.190368	20.4962	0.487746	0.0392454		1.18175e-06	-59.7914	-1.42285	-0.114486		0.539671	-3.34783	-0.079668	-0.00641031		0.159035	-7.88566	-0.187654	-0.0151572
25858	Temp. Occipital Fusiform Cx, L	H-O-D	None	3376.74	541.659	0.0391699	0	-101.02	-2.99166	-0.186502		0.000282705	42.37	1.25476	0.0782226		0.360771	-5.21968	-0.154577	-0.00963645		0.113219	-25.9419	-0.768253	-0.0478934		0.532016	8.1606	0.241671	0.0150659		0.677458	-2.39084	-0.0708033	-0.00441392		0.350065	-5.46564	-0.161862	-0.0102118
25859	Temp. Occipital Fusiform Cx, R	H-O-D	None	4297.89	671.548	0.0530738	0	-150.201	-3.49476	-0.223664		0.374276	12.71	0.295726	0.0189264		0.236737	-8.32456	-0.193689	-0.0123961		0.0515678	-39.2573	-0.91341	-0.058458		0.333665	-15.5077	-0.360821	-0.0230925		0.31542	7.11849	0.165627	0.0106001		0.489281	4.9885	0.116069	0.00751968
25860	Occipital Fusiform Gyrus, L	H-O-D	None	5078.83	733.275	0.104043	0	-215.758	-4.24819	-0.294239		0	145.445	2.86375	0.19835		0.160011	-10.5306	-0.207343	-0.014361		0.0185659	-50.7561	-0.999366	-0.0692184		0.0113555	-43.3011	-0.85258	-0.0590516		8.23136e-05	-29.7007	-0.584795	-0.0405042		0.170907	-10.6365	-0.209429	-0.0145055
25861	Occipital Fusiform Gyrus, R	H-O-D	None	4800.55	734.206	0.110714	0	-230.042	-4.79199	-0.31332		0	184.695	3.84738	0.251558		0.0339381	-15.9927	-0.333144	-0.0217823		0.138979	-32.0373	-0.667367	-0.0436353		0.0288998	-37.5109	-0.781388	-0.0510904		0.553207	-4.50321	-0.0938062	-0.00613344		0.316378	-7.79382	-0.162353	-0.0106735
25862	Frontal Operculum Cx, L	H-O-D	cognitive	1949.52	317.606	0.112741	0	-86.4757	-4.43574	-0.272274		0	83.3877	4.27734	0.262551		0.481214	-2.29888	-0.11792	-0.00723816		0.544346	-5.68655	-0.29169	-0.0179044		0.31372	-7.49316	-0.384359	-0.0235926		0.501615	2.20888	0.113303	0.00695477		0.025736	-7.4862	-0.384002	-0.023724
25863	Frontal Operculum Cx, R	H-O-D	cognitive	1728.95	300.598	0.0982319	0	-77.1701	-4.4634	-0.256722		0	65.831	3.80757	0.219		0.203678	-3.94448	-0.228143	-0.0131221		0.195916	-11.518	-0.666186	-0.0383171		0.302899	-7.28774	-0.421512	-0.0242442		0.984752	-0.0597248	-0.00345439	-0.000198687		0.0819599	-5.53694	-0.320248	-0.0186022
25864	Central Opercular Cx, L	H-O-D	None	4868.07	642.226	0.152742	0	-218.975	-4.49818	-0.340962		0	113.334	2.32812	0.176471		0.71939	-2.30565	-0.0473627	-0.00359009		0.969229	0.712292	0.0146319	0.0011091		0.000446787	-51.1708	-1.05115	-0.0796772		0.0113778	16.374	0.336354	0.0254956		0.0995989	-10.8894	-0.223691	-0.0170414
25865	Central Opercular Cx, R	H-O-D	None	4818.75	667.348	0.152502	0	-223.354	-4.63511	-0.334689		0	166.21	3.44923	0.249061		0.891625	0.903731	0.0187544	0.00135421		0.028853	-41.5189	-0.86161	-0.0622147		0.0570095	-28.7209	-0.596023	-0.0430373		0.0166747	16.0012	0.332062	0.0239773		0.114238	-10.7475	-0.223035	-0.0162516
25866	Parietal Operculum Cx, L	H-O-D	None	2659.55	514.77	0.0466789	0	-91.3523	-3.43488	-0.177462		3.89067e-12	-75.9188	-2.85457	-0.147481		0.160351	-7.65945	-0.287998	-0.0148794		0.789047	4.20785	0.158216	0.00817423		0.986302	0.214053	0.00804848	0.000415823		1.00427e-05	24.398	0.917372	0.0473959		0.674831	-2.3442	-0.0881427	-0.00461276
25867	Parietal Operculum Cx, R	H-O-D	None	2629.92	472.074	0.056586	0	-100.28	-3.81304	-0.212424		1.41089e-11	-67.1061	-2.55164	-0.142152		0.0898145	-8.39054	-0.319042	-0.0177738		0.113578	22.6443	0.861026	0.0479677		0.806206	-2.77156	-0.105386	-0.00587103		0.0221886	11.4242	0.434395	0.0242001		0.540091	-3.09804	-0.1178	-0.00665932
25868	Planum Polare, L	H-O-D	Auditory	1769.6	250.579	0.176074	0	-79.9737	-4.51932	-0.319156		0	103.582	5.85344	0.413371		0.982264	0.0544912	0.0030793	0.000217461		0.769698	2.06535	0.116713	0.00824233		0.000851168	-18.5643	-1.04907	-0.0740857		0.648443	-1.12391	-0.0635121	-0.00448524		0.0706329	-4.54204	-0.256671	-0.0183061
25869	Planum Polare, R	H-O-D	Auditory	1875.52	256.595	0.202399	0	-93.2946	-4.97433	-0.363586		0	103.364	5.51122	0.402829		0.330333	-2.40118	-0.128027	-0.00935785		0.939146	-0.541922	-0.0288945	-0.00211197		2.74379e-05	-23.4833	-1.25209	-0.0915187		0.00410365	7.14182	0.380791	0.027833		0.0234574	-5.74337	-0.306228	-0.0225582
25870	Heschl's Gyrus, L	H-O-D	Auditory	1536.81	308.272	0.126029	0	-105.679	-6.87647	-0.342809		0.0458382	-12.4961	-0.813115	-0.0405358		0.33775	2.97231	0.193407	0.00964184		0.321541	8.85784	0.576377	0.0287338		0.00668536	-19.0546	-1.23988	-0.0618111		0.00571954	8.63746	0.562036	0.0280189		0.931596	0.270584	0.0176068	0.000893993
25871	Heschl's Gyrus, R	H-O-D	Auditory	1322.28	232.834	0.160527	0	-88.2766	-6.67608	-0.37914		0.000210165	17.393	1.31538	0.0747013		0.351092	2.14424	0.162162	0.00920931		0.766166	-1.96395	-0.148528	-0.00843501		0.000593671	-17.8903	-1.35299	-0.0768373		0.000257658	8.47746	0.641124	0.0364099		0.0479838	-4.6417	-0.351037	-0.0201912
25872	Planum Temp.e, L	H-O-D	Auditory	2648.39	530.995	0.061987	0	-94.6454	-3.5737	-0.178242		0	-154.007	-5.81512	-0.290035		0.733616	1.87235	0.0706977	0.00352612		0.800062	4.0096	0.151397	0.0075511		0.39935	10.5981	0.400171	0.0199589		1.94773e-07	28.9744	1.09404	0.0545662		0.501315	-3.75611	-0.141826	-0.00721321
25873	Planum Temp.e, R	H-O-D	Auditory	2079.25	350.495	0.0777849	0	-94.5212	-4.54593	-0.269679		2.61406e-09	-43.6713	-2.10034	-0.124599		0.425636	2.91074	0.13999	0.00830467		0.254936	11.9903	0.576666	0.0342097		0.741973	-2.7411	-0.131831	-0.00782067		0.00734613	9.87154	0.474765	0.0281646		0.155397	-5.32257	-0.255985	-0.0153193
25874	Supracalcarine Cx, L	H-O-D	None	654.58	134.649	0.0190888	0	-14.9044	-2.27695	-0.110691		0.116662	4.68162	0.715209	0.034769		0.688253	-0.587868	-0.0898085	-0.00436593		0.872152	-0.67816	-0.103602	-0.0050365		0.00470411	9.52536	1.45519	0.0707421		0.692394	-0.583126	-0.089084	-0.00433071		0.0420872	-3.05203	-0.466257	-0.0228829
25875	Supracalcarine Cx, R	H-O-D	None	939.276	189.078	0.0275128	0	-26.2855	-2.79849	-0.139019		0.00379875	12.0931	1.2875	0.0639584		0.130672	-3.088	-0.328764	-0.0163318		0.186985	-7.73514	-0.823521	-0.0409097		0.0420316	9.54304	1.016	0.0504713		0.353853	1.91061	0.203413	0.0101048		0.240163	-2.45846	-0.26174	-0.013158
25876	Occipital Pole, L	H-O-D	None	11027.3	1650.75	0.092365	0	-549.295	-4.98123	-0.332754		2.77556e-15	277.708	2.51836	0.168231		0.8261	-3.75247	-0.0340289	-0.00227319		0.0385196	-101.22	-0.917908	-0.0613179		0.16098	-54.509	-0.494309	-0.0330207		0.000449259	-60.165	-0.5456	-0.0364471		0.176789	-23.6616	-0.214573	-0.0144717
25877	Occipital Pole, R	H-O-D	None	10507.7	1540.36	0.0549978	0	-425.55	-4.04989	-0.276266		1.57843e-05	-142.597	-1.35707	-0.0925737		0.36558	-14.8162	-0.141003	-0.00961862		0.0149185	-114.136	-1.08621	-0.0740968		0.826224	-8.20606	-0.0780957	-0.00532736		0.00520675	-45.9683	-0.437473	-0.0298425		0.384718	-14.7078	-0.139972	-0.00957738
25878	Thalamus, L	H-O-D	Auditory	3476.16	360.141	0.0888515	4.44089e-16	-48.9337	-1.40769	-0.135874		0	194.719	5.60156	0.540675		0.448252	-2.78705	-0.0801762	-0.00773878		0.949899	-0.664437	-0.0191141	-0.00184494		0.538165	5.16845	0.148683	0.0143512		9.29789e-09	-21.1976	-0.609799	-0.0588591		0.730051	1.30897	0.0376556	0.0036517
25879	Thalamus, R	H-O-D	Auditory	3621.39	382.48	0.0613314	1.86908e-06	-7.70299	-0.212708	-0.0201396		0	169.703	4.68612	0.443691		0.480817	-2.65266	-0.0732497	-0.00693541		0.839464	-2.19262	-0.0605462	-0.00573263		0.0184196	20.3048	0.56069	0.0530872		8.11787e-09	-21.789	-0.601675	-0.0569677		0.459728	2.86591	0.0791384	0.00754363
25880	Caudate, L	H-O-D	None	3864.73	749.092	0.0330519	3.18834e-12	87.6873	2.26891	0.117058		0	194.561	5.03426	0.259729		0.671472	3.08837	0.0799117	0.00412282		0.511633	-13.7163	-0.35491	-0.0183106		3.33067e-16	138.154	3.57473	0.184428		0.0727688	-13.1176	-0.339418	-0.0175113		0.155825	10.3871	0.268768	0.0143136
25881	Caudate, R	H-O-D	None	4109.05	783.632	0.0321631	0	114.893	2.79609	0.146616		0	166.862	4.06086	0.212935		0.650377	3.4277	0.0834185	0.00437412		0.642334	-10.0864	-0.245468	-0.0128713		1.11022e-16	146.092	3.55538	0.186429		0.243531	-8.85977	-0.215616	-0.011306		0.328453	7.42899	0.180796	0.00977993
25882	Putamen, L	H-O-D	None	2239.94	511.064	0.0107005	4.60747e-08	-51.3048	-2.29045	-0.100388		1.46667e-10	72.9704	3.2577	0.142781		0.6413	-2.56909	-0.114695	-0.00502694		0.409611	-13.0488	-0.582551	-0.0255326		0.000116371	49.0694	2.19066	0.0960141		0.508462	-3.66742	-0.163729	-0.00717604		0.570042	-3.1932	-0.142557	-0.00635102
25883	Putamen, R	H-O-D	None	2767.62	560.6	0.0192622	2.16582e-12	-70.199	-2.53644	-0.125221		0	117.974	4.26267	0.210443		0.385926	-5.22234	-0.188694	-0.00931563		0.581088	-9.55238	-0.345148	-0.0170396		0.226973	16.6717	0.602384	0.0297391		0.845765	-1.17956	-0.0426201	-0.00210411		0.75784	-1.90492	-0.0688289	-0.00343534
25884	Pallidum, L	H-O-D	None	49.353	43.1487	0.0369134	0	5.69788	11.5452	0.132052		4.53585e-11	4.4995	9.11698	0.104279		0.186508	-0.423522	-0.85815	-0.00981541		0.0503515	-1.77973	-3.60613	-0.0412465		2.52131e-05	3.19606	6.47593	0.0740708		0.441876	0.249736	0.50602	0.00578779		0.0148154	0.656598	1.33041	0.0190059
25885	Pallidum, R	H-O-D	None	72.9002	49.178	0.0440843	0	8.4771	11.6284	0.172376		2.0434e-11	5.58683	7.66368	0.113604		0.739914	-0.131156	-0.179912	-0.00266697		0.471755	-0.813968	-1.11655	-0.0165515		4.1316e-06	4.27834	5.86877	0.0869971		0.770095	0.116357	0.159611	0.00236603		0.815996	0.0806609	0.110646	0.00194057
25886	Hippocampus, L	H-O-D	cognitive	5439.48	486.427	0.150486	0	-159.395	-2.93034	-0.327686		0	242.933	4.46611	0.499424		0.400186	-4.07275	-0.0748738	-0.00837278		0.166029	19.2876	0.354585	0.0396515		0.000166092	-41.6144	-0.765044	-0.0855511		0.00015313	-18.4455	-0.339105	-0.0379205		0.692423	1.98471	0.0364872	0.00408018
25887	Hippocampus, R	H-O-D	cognitive	5645.41	506.621	0.14844	0	-165.93	-2.93921	-0.327524		0	259.12	4.58992	0.511467		0.263051	-5.64999	-0.100081	-0.0111523		0.123401	22.3719	0.396284	0.044159		0.0187157	-27.0869	-0.479803	-0.0534657		1.63258e-05	-21.8996	-0.387918	-0.0432267		0.694744	-2.05315	-0.0363684	-0.00405263
25888	Amygdala, L	H-O-D	None	2349.13	261.571	0.159844	0	-104.27	-4.43865	-0.398627		0	89.5489	3.812	0.34235		0.00164269	-8.15246	-0.347042	-0.0311673		0.991897	-0.0756269	-0.00321936	-0.000289125		6.5276e-05	-23.598	-1.00454	-0.0902161		0.647529	1.19073	0.0506881	0.00455221		0.250865	-3.08101	-0.131155	-0.0117788
25889	Amygdala, R	H-O-D	None	2695.4	292.132	0.193214	0	-123.645	-4.58726	-0.42325		0	121.696	4.51494	0.416578		0.00436568	-8.07801	-0.299696	-0.0276519		0.237484	9.62749	0.357182	0.0329559		3.81289e-05	-26.6399	-0.988345	-0.0911912		0.677972	1.18355	0.0439101	0.00405143		0.0960034	-4.88831	-0.181357	-0.0167332
25890	Ventral Striatum, L	H-O-D	None	720.239	137.805	0.165494	0	-64.2835	-8.9253	-0.466481		7.33395e-08	14.8528	2.0622	0.107781		0.0131605	-3.3708	-0.468012	-0.0244606		0.0693699	-7.10093	-0.985913	-0.0515288		1.88207e-05	-13.2774	-1.84347	-0.0963492		0.587719	-0.74137	-0.102934	-0.00537984		0.888277	0.197916	0.0274792	0.0014362
25891	Ventral Striatum, R	H-O-D	None	747.844	133.587	0.131564	0	-54.2058	-7.24827	-0.40577		0.00019852	10.1487	1.35706	0.0759706		0.12629	-2.05528	-0.274828	-0.0153853		0.00686034	-10.4553	-1.39806	-0.0782657		1.48125e-05	-13.293	-1.7775	-0.0995077		0.169414	1.85827	0.248483	0.0139105		0.833872	0.292201	0.0390724	0.00218734
25892	Brain-Stem	H-O-D	Auditory	6310.65	1028.42	0.123036	0	-340.141	-5.38996	-0.330741		0	202.241	3.20475	0.196652		0.223524	-11.7055	-0.185489	-0.0113821		0.21048	-34.5759	-0.547898	-0.0336204		0.547831	13.2142	0.209396	0.0128491		7.80917e-06	-43.1636	-0.68398	-0.0419707		0.0500355	19.2961	0.305771	0.0190406
25893	I-IV Cerebellum, L	H-O-D	None	2360.64	352.068	0.0854782	0	-94.8072	-4.01617	-0.269286		0	128.888	5.45991	0.366089		0.049603	-7.2234	-0.305994	-0.020517		0.894626	-1.40326	-0.0594441	-0.00398576		0.000981309	-27.5549	-1.16727	-0.0782657		0.0253969	-8.27181	-0.350406	-0.0234949		0.0330995	8.10374	0.343286	0.0231543
25894	I-IV Cerebellum, R	H-O-D	None	2679.91	386.114	0.0995649	0	-110.754	-4.13275	-0.286843		0	157.928	5.89305	0.40902		0.0145616	-9.76256	-0.364287	-0.0252842		0.058061	-21.7334	-0.810976	-0.0562876		0.0350439	-19.1851	-0.715887	-0.0496878		0.000502518	-13.9787	-0.521611	-0.0362036		0.125209	6.32906	0.236167	0.0164941
25895	V Cerebellum, L	H-O-D	None	3323.18	468.762	0.0999411	0	-142.879	-4.29947	-0.304801		0	169.489	5.1002	0.361567		0.0727453	-8.61754	-0.259316	-0.0183836		0.690673	-5.49651	-0.165399	-0.0117256		0.0013585	-35.1104	-1.05653	-0.0749004		0.492733	-3.31386	-0.0997195	-0.00706939		0.0986775	8.21897	0.247322	0.0175334
25896	V Cerebellum, R	H-O-D	None	3310.82	459.676	0.0924766	0	-138.404	-4.18035	-0.30109		0	159.063	4.80432	0.346032		0.0179988	-11.1874	-0.337905	-0.0243376		0.601166	-7.10943	-0.214733	-0.0154662		0.00440267	-30.7331	-0.928262	-0.0668581		0.14663	-6.90513	-0.208562	-0.0150217		0.0937864	8.2129	0.248062	0.0178667
25897	VI Cerebellum, L	H-O-D	None	8557.27	1319.09	0.165616	0	-536.935	-6.27461	-0.40705		0	482.525	5.63877	0.365802		0.000460028	-45.5913	-0.532779	-0.0345627		0.0587248	-70.7453	-0.826728	-0.0536319		7.19164e-05	-117.909	-1.37788	-0.0893868		0.965676	-0.563222	-0.00658179	-0.000426978		0.595482	7.15898	0.0836596	0.00542721
25898	Vermis VI Cerebellum	H-O-D	None	1924.82	315.387	0.12818	0	-81.8798	-4.25389	-0.259617		0	173.746	9.02657	0.550897		0.273222	-3.48404	-0.181006	-0.0110469		0.611798	4.64175	0.241152	0.0147176		0.0015938	-22.9129	-1.19039	-0.0726503		0.0118726	-8.04946	-0.418192	-0.0255225		0.269099	3.64216	0.18922	0.0115482
25899	VI Cerebellum, R	H-O-D	None	8366.05	1286.73	0.167677	0	-519.672	-6.21168	-0.403872		0	521.021	6.22781	0.40492		0.00171843	-39.7489	-0.475121	-0.0308915		0.399659	-30.7078	-0.367052	-0.023865		3.7079e-05	-119.367	-1.4268	-0.0927679		0.379442	11.208	0.13397	0.00871051		0.229649	15.7819	0.188642	0.0122651
25900	Crus I Cerebellum, L	H-O-D	None	13666.9	2096.42	0.172814	0	-743.519	-5.4403	-0.354661		0	985.961	7.21423	0.470307		0.00337474	-60.3653	-0.44169	-0.0287945		0.013931	-145.646	-1.06568	-0.0694736		0.00242088	-142.526	-1.04286	-0.0679855		0.755811	-6.44109	-0.0471291	-0.00307242		0.972191	-0.743841	-0.00544265	-0.000354815
25901	Vermis Crus I Cerebellum	H-O-D	None	2.72827	1.97503	0.0107838	1.12133e-14	-0.234115	-8.58108	-0.118537		0.0649844	0.0917614	3.36335	0.0464607		0.764004	-0.0072635	-0.266231	-0.00367766		0.298455	-0.0717294	-2.62912	-0.0363181		0.99407	0.000410731	0.0150546	0.000207962		0.233517	-0.0289128	-1.05975	-0.0146391		0.627309	-0.0115957	-0.42502	-0.00616001
25902	Crus I Cerebellum, R	H-O-D	None	14761.5	2241.82	0.170881	0	-908.047	-6.15146	-0.405049		0	742.406	5.02934	0.331162		0.00226775	-67.3043	-0.455946	-0.0300222		0.00583292	-174.833	-1.18438	-0.077987		3.81728e-05	-207.231	-1.40386	-0.0924388		0.825622	-4.88538	-0.0330955	-0.0021792		0.618789	-11.3667	-0.0770023	-0.00507029
25903	Crus II Cerebellum, L	H-O-D	None	10184.1	1600.67	0.152791	0	-520.673	-5.1126	-0.325284		0	742.972	7.29541	0.464162		0.0532975	-30.7464	-0.301906	-0.0192084		0.202732	-58.2906	-0.572368	-0.0364163		4.22438e-10	-226.972	-2.22869	-0.141798		0.414922	-13.0479	-0.12812	-0.00815148		0.0577989	31.2846	0.30719	0.0195446
25904	Vermis Crus II Cerebellum	H-O-D	None	510.011	103.331	0.0821228	0	-16.9745	-3.32827	-0.164273		0	50.2181	9.84648	0.485991		0.163804	-1.48847	-0.29185	-0.0144048		0.588788	1.66217	0.325909	0.0160858		0.00390376	-7.04075	-1.38051	-0.0681376		0.00169362	-3.37686	-0.662116	-0.03268		0.646836	0.507593	0.0995259	0.00491229
25905	Crus II Cerebellum, R	H-O-D	None	10006.1	1559.82	0.165704	0	-545.049	-5.44716	-0.34943		0	688.837	6.88416	0.441612		0.0140572	-37.7862	-0.377631	-0.0242247		0.050795	-86.4388	-0.863859	-0.0554158		9.58881e-10	-214.93	-2.14799	-0.137791		0.14044	-22.8161	-0.228022	-0.0146274		0.0951697	26.6089	0.265927	0.0170589
25906	VIIb Cerebellum, L	H-O-D	None	4850.21	901.645	0.149247	0	-292.733	-6.03546	-0.324665		0	408.486	8.42203	0.453045		0.00115738	-29.1859	-0.601745	-0.0323696		0.022842	-58.7983	-1.21228	-0.0652122		2.22045e-16	-168.2	-3.46789	-0.186548		0.794485	2.35324	0.0485183	0.00260994		0.280478	10.0448	0.2071	0.0111405
25907	Vermis VIIb Cerebellum	H-O-D	None	174.468	38.1266	0.121592	0	-8.68107	-4.97575	-0.227691		0	20.8201	11.9335	0.546078		0.0481648	-0.76247	-0.437027	-0.0199984		0.560968	-0.645262	-0.369846	-0.0169242		3.92786e-06	-4.06582	-2.33042	-0.10664		0.602445	-0.20219	-0.11589	-0.00530312		0.268927	0.442114	0.253408	0.0115959
25908	VIIb Cerebellum, R	H-O-D	None	5162.42	946.363	0.148103	0	-315.201	-6.10567	-0.333065		0	413.9	8.01755	0.437359		0.000289365	-34.1987	-0.662455	-0.036137		0.1769	-36.6354	-0.709655	-0.0387118		5.55112e-16	-174.703	-3.38413	-0.184605		0.792107	2.50089	0.048444	0.00264263		0.263722	10.9254	0.211633	0.0115446
25909	VIIIa Cerebellum, L	H-O-D	None	4713.25	926.755	0.174115	0	-326.805	-6.93374	-0.352633		0	474.1	10.0589	0.51157		5.38398e-05	-36.7415	-0.779536	-0.0396453		0.191444	-34.1722	-0.725023	-0.036873		0	-184.694	-3.9186	-0.199291		0.973093	-0.308586	-0.00654719	-0.000332974		0.401183	7.91279	0.167884	0.00853817
25910	Vermis VIIIa Cerebellum	H-O-D	None	1116.99	231.268	0.147833	0	-68.336	-6.11785	-0.295484		0	127.209	11.3885	0.550049		0.00429894	-6.58368	-0.589411	-0.0284678		0.0971207	-11.0009	-0.98487	-0.0475679		7.14589e-07	-26.0948	-2.33616	-0.112834		0.461498	-1.70775	-0.152888	-0.00738429		0.0723777	4.29311	0.384345	0.0185633
25911	VIIIa Cerebellum, R	H-O-D	None	4736.56	976.05	0.178349	0	-319.823	-6.75221	-0.327671		0	540.41	11.4093	0.55367		0.000150148	-36.2292	-0.764884	-0.0371182		0.40315	-22.9727	-0.485008	-0.0235364		0	-202.938	-4.28451	-0.207918		0.277529	10.4364	0.220337	0.0106925		0.361435	9.03634	0.190778	0.00925808
25912	VIIIb Cerebellum, L	H-O-D	None	3301.34	645.177	0.106715	0	-172.838	-5.23541	-0.267893		0	274.161	8.30454	0.424939		0.0299321	-14.2962	-0.433043	-0.0221586		0.227779	-22.843	-0.691931	-0.0354057		6.08402e-14	-112.957	-3.42155	-0.175079		0.88816	0.93153	0.0282168	0.00144384		0.732557	2.33197	0.0706371	0.00361446
25913	Vermis VIIIb Cerebellum	H-O-D	None	554.102	109.604	0.0996648	0	-24.2063	-4.36856	-0.220853		0	50.2894	9.07584	0.458829		0.00364013	-3.26606	-0.589433	-0.0297988		0.00185818	-10.0547	-1.81459	-0.0917363		2.86345e-08	-14.2329	-2.56864	-0.129857		0.992587	0.0104961	0.00189425	9.5764e-05		0.865825	0.19665	0.0354898	0.00179418
25914	VIIIb Cerebellum, R	H-O-D	None	3322.77	695.276	0.128952	0	-170.949	-5.14478	-0.245873		0	356.831	10.739	0.513222		0.0290633	-15.2949	-0.460307	-0.0219984		0.18688	-26.6016	-0.800584	-0.0382604		7.10543e-15	-124.652	-3.75145	-0.179284		0.788975	1.88655	0.0567765	0.00271339		0.25456	8.27406	0.249011	0.0119004
25915	IX Cerebellum, L	H-O-D	None	2333.95	499.424	0.134762	0	-94.9246	-4.06713	-0.190068		0	325.411	13.9425	0.651573		0.00561171	-13.8727	-0.594389	-0.0277774		0.158045	-20.307	-0.870073	-0.0406609		4.49574e-12	-78.091	-3.34588	-0.156362		0.55302	2.99955	0.128518	0.00600601		0.494488	3.49236	0.149634	0.0071266
25916	Vermis IX Cerebellum	H-O-D	None	532.114	114.736	0.0888058	0	-18.9001	-3.55188	-0.164726		0	60.9449	11.4534	0.531173		0.0776295	-2.13643	-0.401499	-0.0186203		0.0945428	-5.80217	-1.0904	-0.0505696		2.08776e-06	-12.9809	-2.4395	-0.113137		0.6117	0.619869	0.116492	0.00540255		0.398541	1.0507	0.197457	0.00926012
25917	IX Cerebellum, R	H-O-D	None	2621.72	546.863	0.133583	0	-96.6539	-3.68667	-0.176743		0	353.41	13.4801	0.646249		0.00532953	-15.3282	-0.584663	-0.0280293		0.0134586	-38.9263	-1.48477	-0.0711812		1.71085e-13	-91.2773	-3.48159	-0.166911		0.696576	-2.16299	-0.082503	-0.00395528		0.992088	-0.0557415	-0.00212615	-0.000103664
25918	X Cerebellum, L	H-O-D	None	645.515	96.1416	0.0859761	0	-29.3289	-4.54349	-0.305059		0	19.742	3.05833	0.205343		0.182653	-1.32267	-0.204902	-0.0137575		0.699289	-1.10274	-0.170831	-0.0114699		0.0163388	-5.43902	-0.842586	-0.056573		0.00375045	-2.89463	-0.448422	-0.030108		0.822921	-0.230197	-0.035661	-0.00239436
25919	Vermis X Cerebellum	H-O-D	None	293.313	57.828	0.14595	0	-12.6261	-4.30464	-0.218338		0	39.4476	13.449	0.682155		0.506178	-0.383285	-0.130674	-0.00662801		0.199319	-2.12224	-0.72354	-0.0366992		0.000428596	-4.60141	-1.56877	-0.0795706		0.00518621	-1.61819	-0.551694	-0.0279828		0.279709	0.635772	0.216755	0.0111897
25920	X Cerebellum, R	H-O-D	None	594.665	96.2961	0.104325	0	-31.3534	-5.27244	-0.325593		0	22.1814	3.73006	0.230345		0.53629	-0.608571	-0.102338	-0.00631979		0.527798	-1.78711	-0.300524	-0.0185585		0.00654538	-6.10697	-1.02696	-0.0634186		0.118586	-1.54518	-0.259841	-0.0160462		0.194606	1.32294	0.222468	0.0137382
